# Supplementary material for: Frailty and Increased Levels of Symptom Burden Can Predict the Presence of Each Other in HNSCC Patients
Source: MDPI journal article supplement (doi:10.3390/jcm13010212), 2023-12-29
Supplement: s1 [file s1]

## G8 questionnaire

|          | Items                                                                                                                            | Possible answers (score)                             |
|----------|----------------------------------------------------------------------------------------------------------------------------------|------------------------------------------------------|
| <b>A</b> | Has food intake declined over the past 3 months due to loss of appetite, digestive problems, chewing or swallowing difficulties? | 0 : severe decrease in food intake                   |
|          |                                                                                                                                  | 1 : moderate decrease in food intake                 |
|          |                                                                                                                                  | 2 : no decrease in food intake                       |
| <b>B</b> | Weight loss during the last 3 months                                                                                             | 0 : weight loss > 3 kg                               |
|          |                                                                                                                                  | 1 : does not know                                    |
|          |                                                                                                                                  | 2 : weight loss between 1 and 3 kgs                  |
|          |                                                                                                                                  | 3 : no weight loss                                   |
| <b>C</b> | Mobility                                                                                                                         | 0 : bed or chair bound                               |
|          |                                                                                                                                  | 1 : able to get out of bed/chair but does not go out |
|          |                                                                                                                                  | 2 : goes out                                         |
| <b>E</b> | Neuropsychological problems                                                                                                      | 0 : severe dementia or depression                    |
|          |                                                                                                                                  | 1 : mild dementia or depression                      |
|          |                                                                                                                                  | 2 : no psychological problems                        |
| <b>F</b> | Body Mass Index (BMI (weight in kg) / (height in m <sup>2</sup> ))                                                               | 0 : BMI < 19                                         |
|          |                                                                                                                                  | 1 : BMI = 19 to BMI < 21                             |
|          |                                                                                                                                  | 2 : BMI = 21 to BMI < 23                             |
|          |                                                                                                                                  | 3 : BMI = 23 and > 23                                |
| <b>H</b> | Takes more than 3 medications per day                                                                                            | 0 : yes                                              |
|          |                                                                                                                                  | 1 : no                                               |
| <b>P</b> | In comparison with other people of the same age, how does the patient consider his/her health status?                            | 0 : not as good                                      |
|          |                                                                                                                                  | 0.5 : does not know                                  |
|          |                                                                                                                                  | 1 : as good                                          |
|          |                                                                                                                                  | 2 : better                                           |
|          | Age                                                                                                                              | 0 : >85                                              |
|          |                                                                                                                                  | 1 : 80-85                                            |
|          |                                                                                                                                  | 2 : <80                                              |
|          | <b>TOTAL SCORE</b>                                                                                                               | <b>0 – 17</b>                                        |

|                                                                                                                                                                                                                                                                           |                                 |
|---------------------------------------------------------------------------------------------------------------------------------------------------------------------------------------------------------------------------------------------------------------------------|---------------------------------|
| Dear patient, you know your situation best yourself. Please fill out the questionnaire carefully. Please tick mark statements that apply most closely to your situation. You are welcome to ask your relatives or caregivers to help you. Thank you for your cooperation! | <b>Name</b> _____               |
|                                                                                                                                                                                                                                                                           | <b>Surname</b> _____            |
|                                                                                                                                                                                                                                                                           | <b>Date of birth</b> __/__/____ |
|                                                                                                                                                                                                                                                                           | <b>Date</b> __/__/20 __         |

  

| Please mark the level of your symptoms today!                                          |                                   |                                             |                                 |                                                                  |
|----------------------------------------------------------------------------------------|-----------------------------------|---------------------------------------------|---------------------------------|------------------------------------------------------------------|
| <b>Pain</b>                                                                            | <input type="checkbox"/> none     | <input type="checkbox"/> mild               | <input type="checkbox"/> medium | <input type="checkbox"/> severe Pain                             |
| <b>Nausea</b>                                                                          | <input type="checkbox"/> none     | <input type="checkbox"/> mild               | <input type="checkbox"/> medium | <input type="checkbox"/> severe Nausea                           |
| <b>Vomiting</b>                                                                        | <input type="checkbox"/> none     | <input type="checkbox"/> mild               | <input type="checkbox"/> medium | <input type="checkbox"/> severe Vomiting                         |
| <b>Dyspnea</b>                                                                         | <input type="checkbox"/> none     | <input type="checkbox"/> mild               | <input type="checkbox"/> medium | <input type="checkbox"/> severe Dyspnea                          |
| <b>Constipation</b>                                                                    | <input type="checkbox"/> none     | <input type="checkbox"/> mild               | <input type="checkbox"/> medium | <input type="checkbox"/> severe Constipation                     |
| <b>Weakness</b>                                                                        | <input type="checkbox"/> none     | <input type="checkbox"/> mild               | <input type="checkbox"/> medium | <input type="checkbox"/> severe Weakness                         |
| <b>Lack of appetite</b>                                                                | <input type="checkbox"/> none     | <input type="checkbox"/> mild               | <input type="checkbox"/> medium | <input type="checkbox"/> severe Lack of appetite                 |
| <b>Tiredness</b>                                                                       | <input type="checkbox"/> none     | <input type="checkbox"/> mild               | <input type="checkbox"/> medium | <input type="checkbox"/> severe Tiredness                        |
| <b>Depression</b>                                                                      | <input type="checkbox"/> none     | <input type="checkbox"/> mild               | <input type="checkbox"/> medium | <input type="checkbox"/> severe Depression                       |
| <b>Fear</b>                                                                            | <input type="checkbox"/> none     | <input type="checkbox"/> mild               | <input type="checkbox"/> medium | <input type="checkbox"/> severe Fear                             |
| <b>Other .....</b>                                                                     | <input type="checkbox"/> none     | <input type="checkbox"/> mild               | <input type="checkbox"/> medium | <input type="checkbox"/> severe ...                              |
| <b>Other .....</b>                                                                     | <input type="checkbox"/> none     | <input type="checkbox"/> mild               | <input type="checkbox"/> medium | <input type="checkbox"/> severe ...                              |
| Please mark how you feel today!                                                        |                                   |                                             |                                 |                                                                  |
| <b>General condition</b>                                                               | <input type="checkbox"/> very bad | <input type="checkbox"/> bad                | <input type="checkbox"/> medium | <input type="checkbox"/> good <input type="checkbox"/> very good |
| <b>Comments .....</b><br>.....                                                         |                                   |                                             |                                 |                                                                  |
| <b>MIDOS<sup>2</sup>-Score</b> <i>(only to be filled out by medical professionals)</i> |                                   |                                             |                                 | $\Sigma$                                                         |
| Screening performed on    ... / ... / 20 ...                                           |                                   | <b>Signature medical professional .....</b> |                                 |                                                                  |
